# Supplementary material for: A square channel vanadium phosphite framework as a high voltage cathode for Li- and Na-ion batteries
Source: Royal Society of Chemistry journal article supplement (doi:10.1039/d0ma00029a), 2020-01-01
Supplement: d0ma00029a1.pdf [file d0ma00029a1.pdf]

## Electronic Supplementary information

# A square channel vanadium phosphite framework as high voltage cathode for Li- and Na- ion batteries

*Prashanth Sandineni<sup>a</sup>, Pranal Madria<sup>a</sup>, Kartik Ghosh<sup>b</sup>, and Amitava Choudhury<sup>a,\*</sup>*

<sup>a</sup>Department of Chemistry, Missouri University of Science and Technology, Rolla, MO 65409, USA.

<sup>b</sup>Department of Physics, Astronomy and Materials Science and Center for Applied Science and Engineering, Missouri State University, Springfield, Missouri 65897, USA.

\*Corresponding author, e-mail: [choudhurya@mst.edu](mailto:choudhurya@mst.edu)

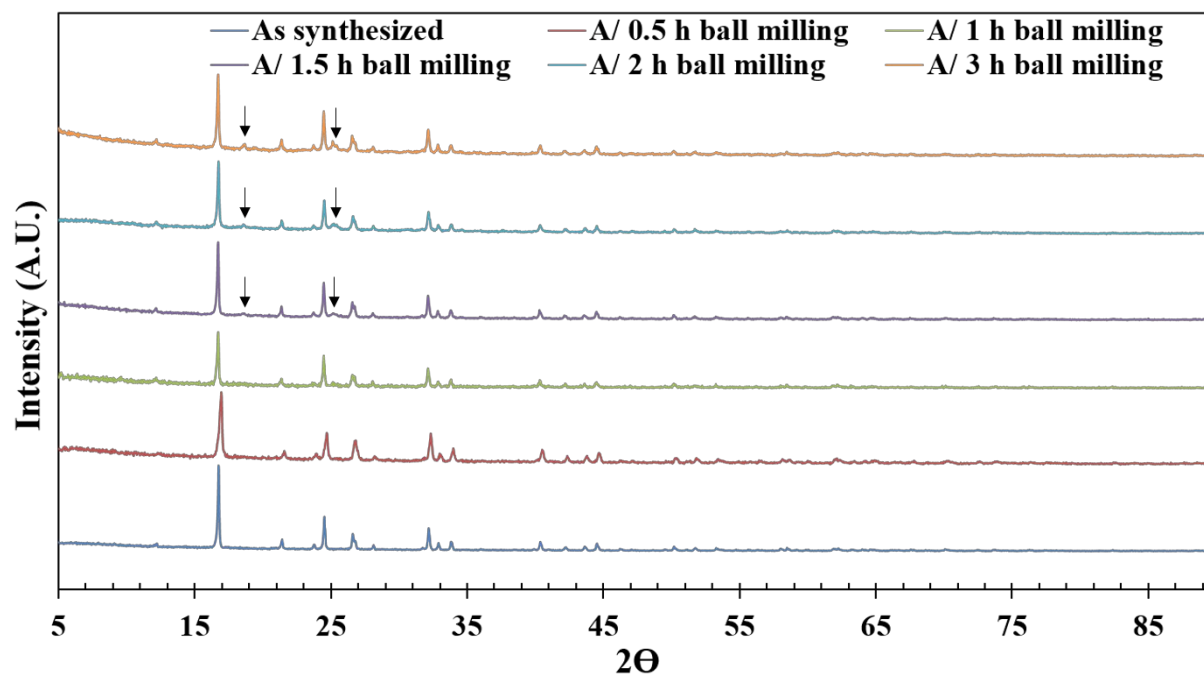

**Figure S1.** Comparison of PXRD data of ball milled samples with as synthesized  $\text{LiV}(\text{HPO}_3)_2$ .

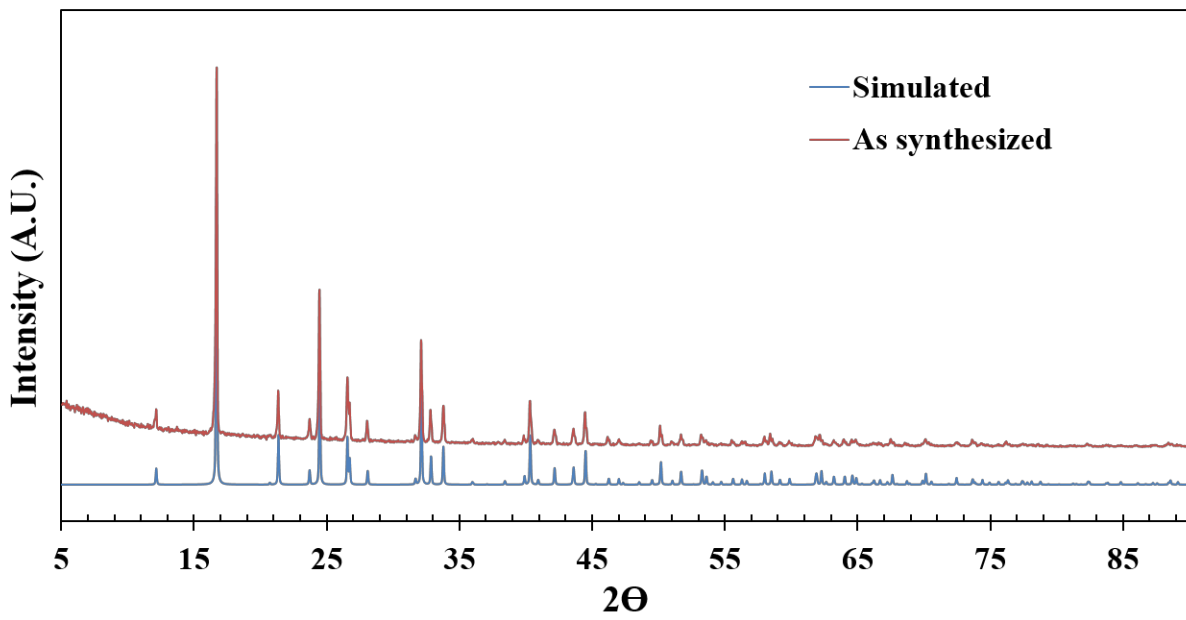

**Figure S2.** Comparison of PXRD data of as synthesized  $\text{LiV}(\text{HPO}_3)_2$  with simulated.

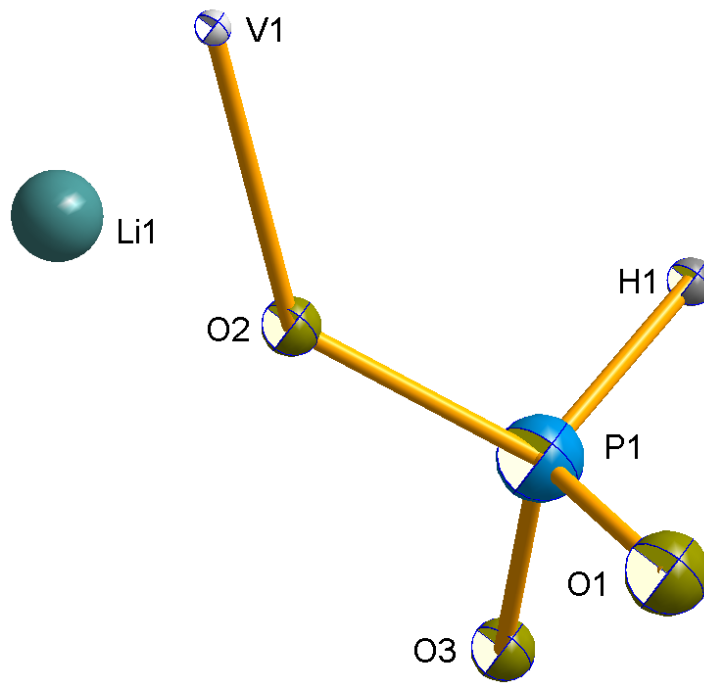

**Figure S3.** Asymmetric unit of  $\text{LiV}(\text{HPO}_3)_2$ .

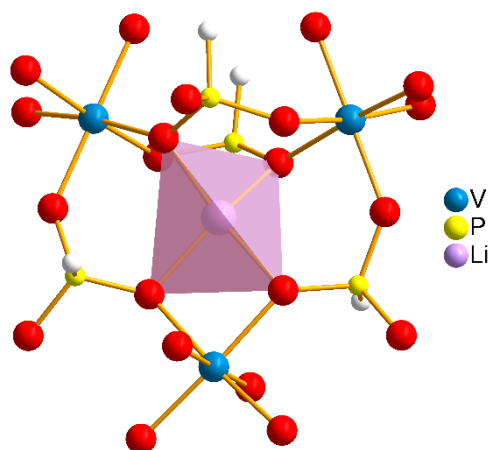

**Figure S4.** Li-coordination in LiV(HPO<sub>3</sub>)<sub>2</sub>.

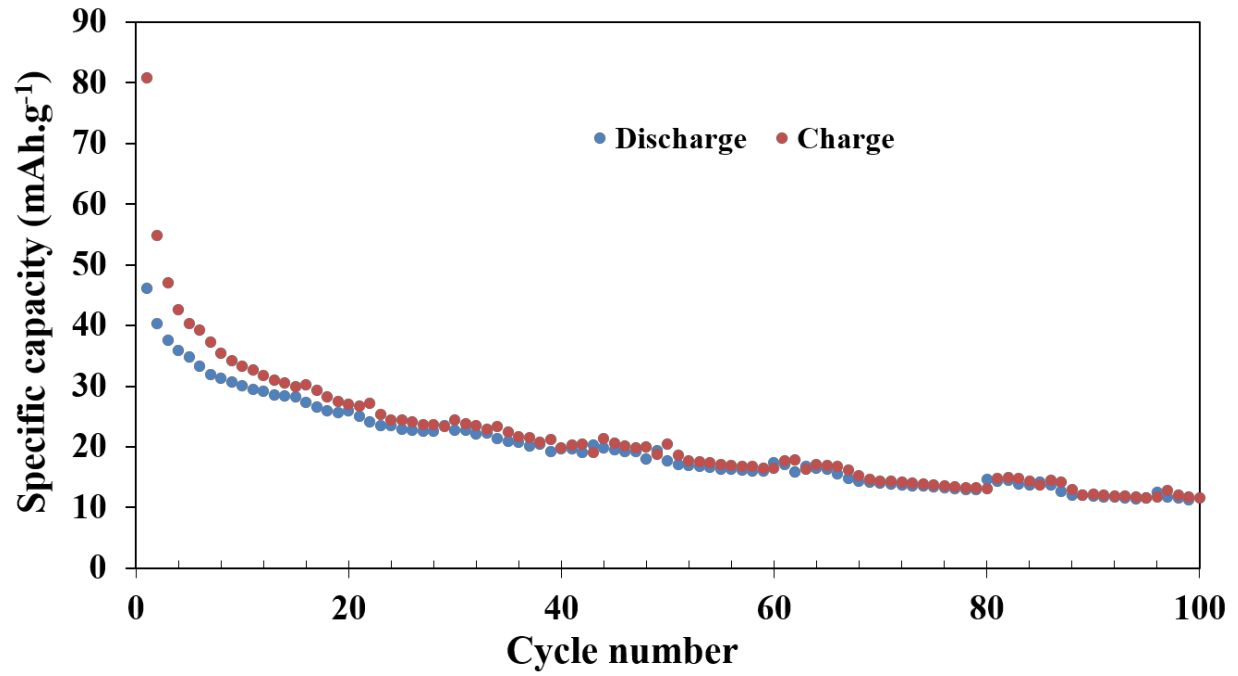

Figure S5. Cycle index of Li-ion battery at C/5 rate for 100 cycles. (from 1.2 V to 4.5 V).

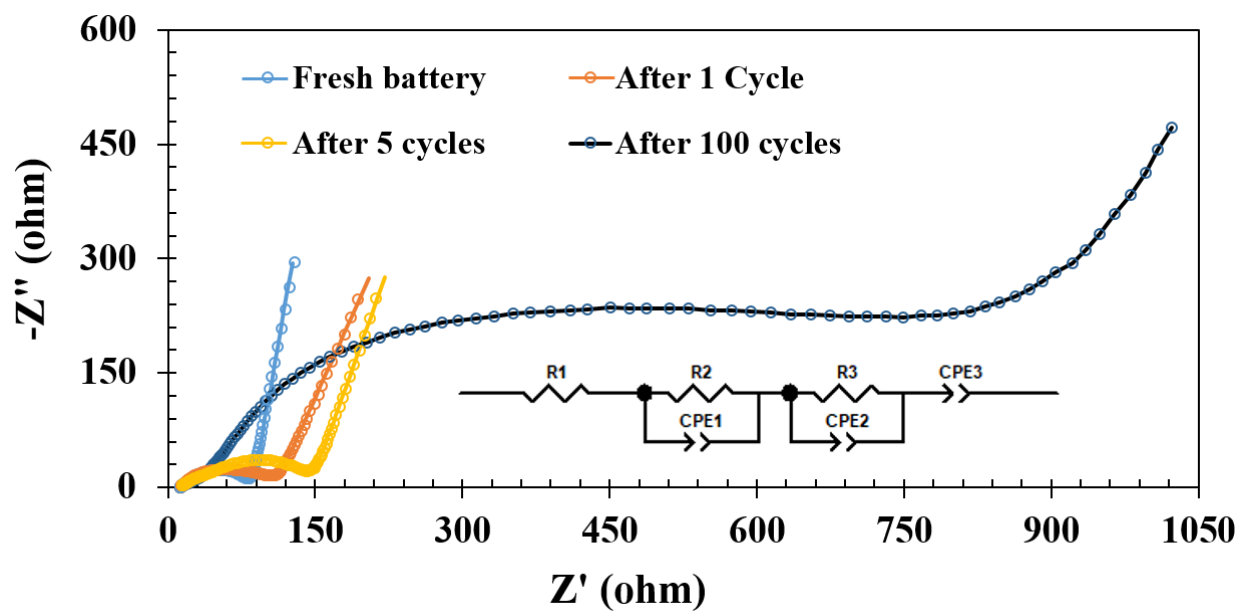

**Figure S6.** Nyquist plots of freshly fabricated and cycled Li-ion batteries.

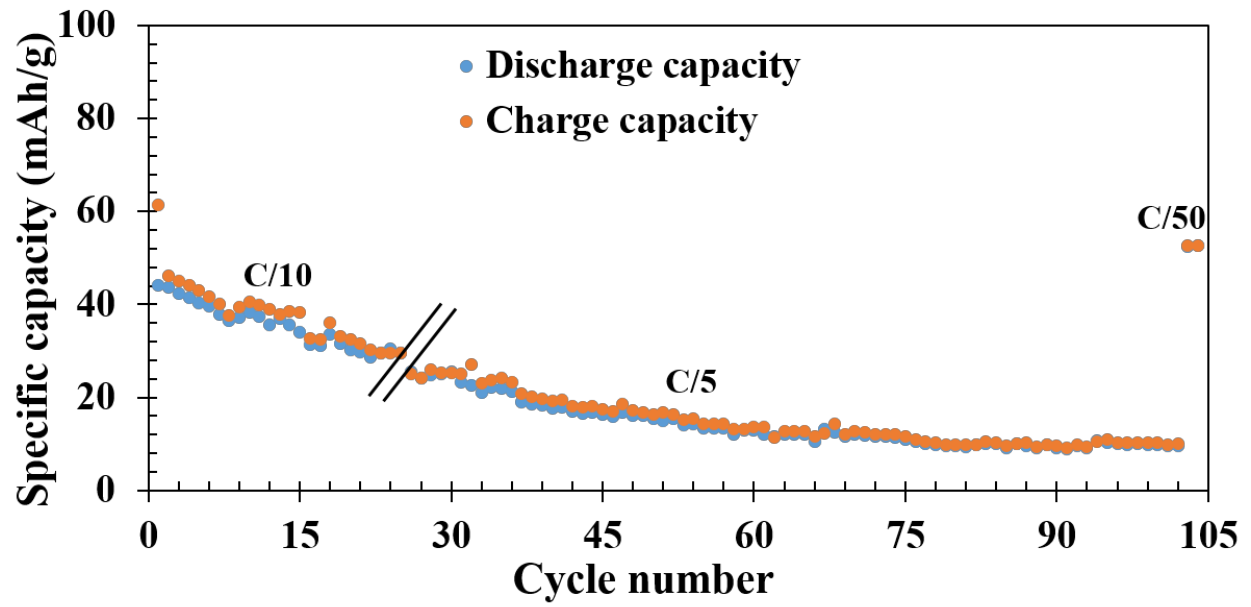

Figure S7. Cycle index of Na-ion battery at C/10 and C/5 rate for 100 cycles.



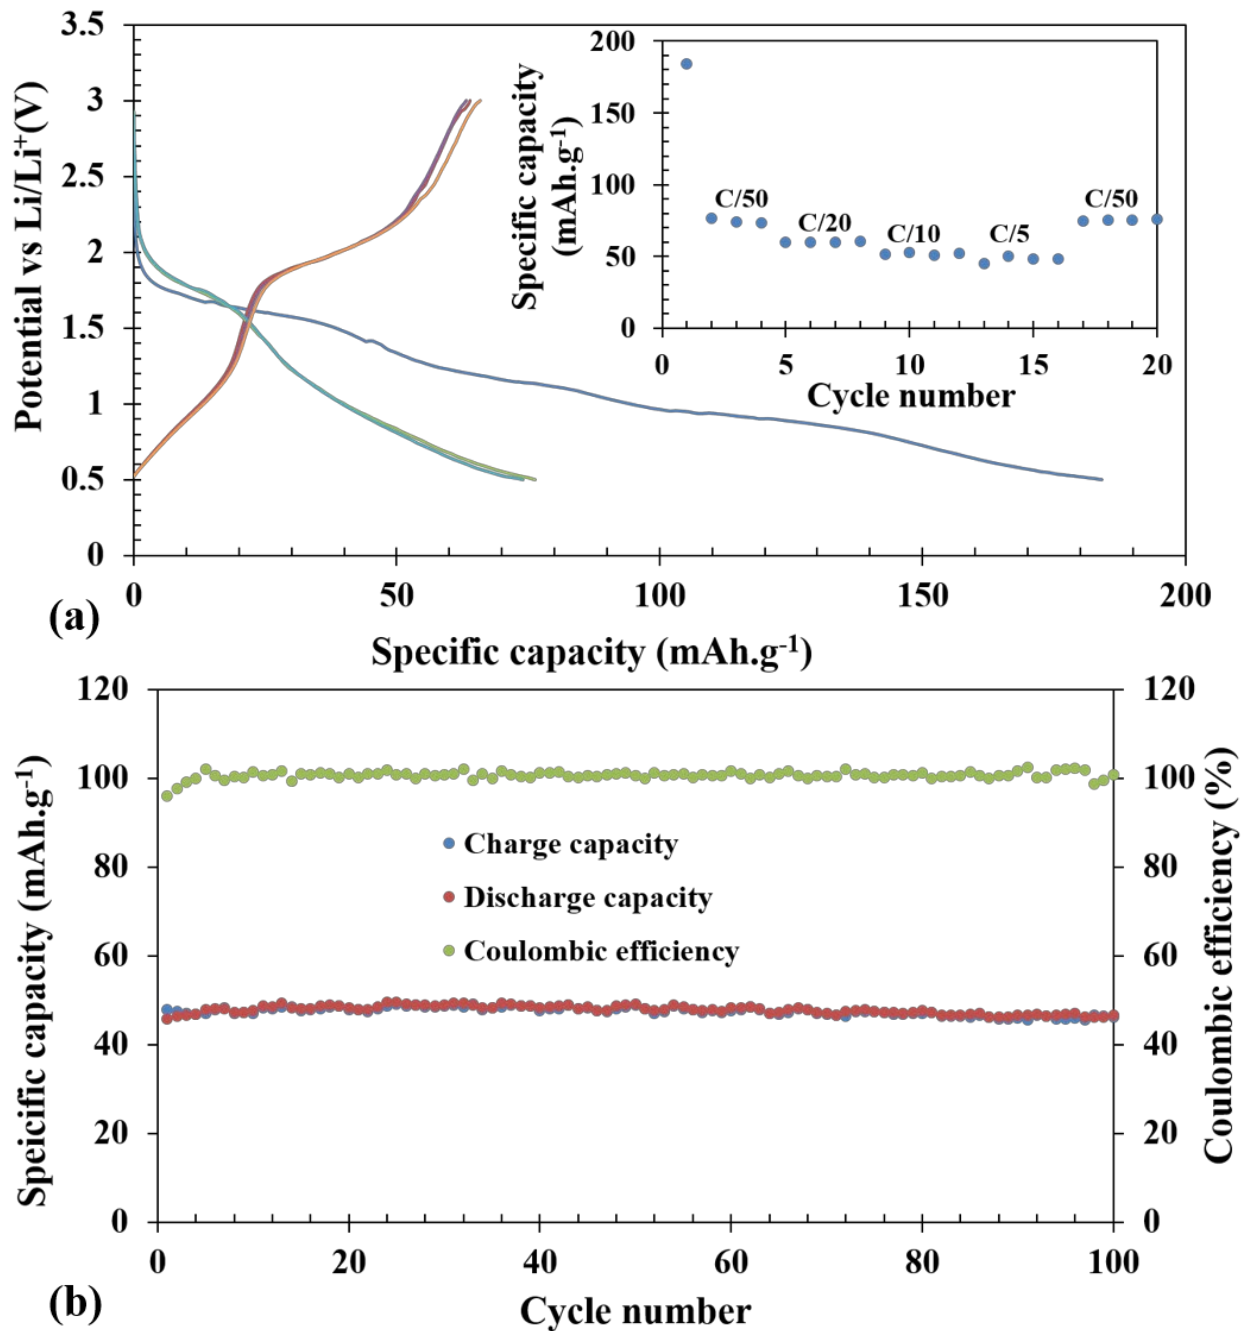

**Figure S8.** Galvanostatic charge-discharge profiles for Li-ion batteries from 0.5 V to 3.0 V at C/50 (a). (Inset shows discharge specific capacity at different C-rates). Cycle index of Li-ion battery along with coulombic efficiency at C/5 rate for 100 cycles after initial 20 cycles at different C-rates (b).

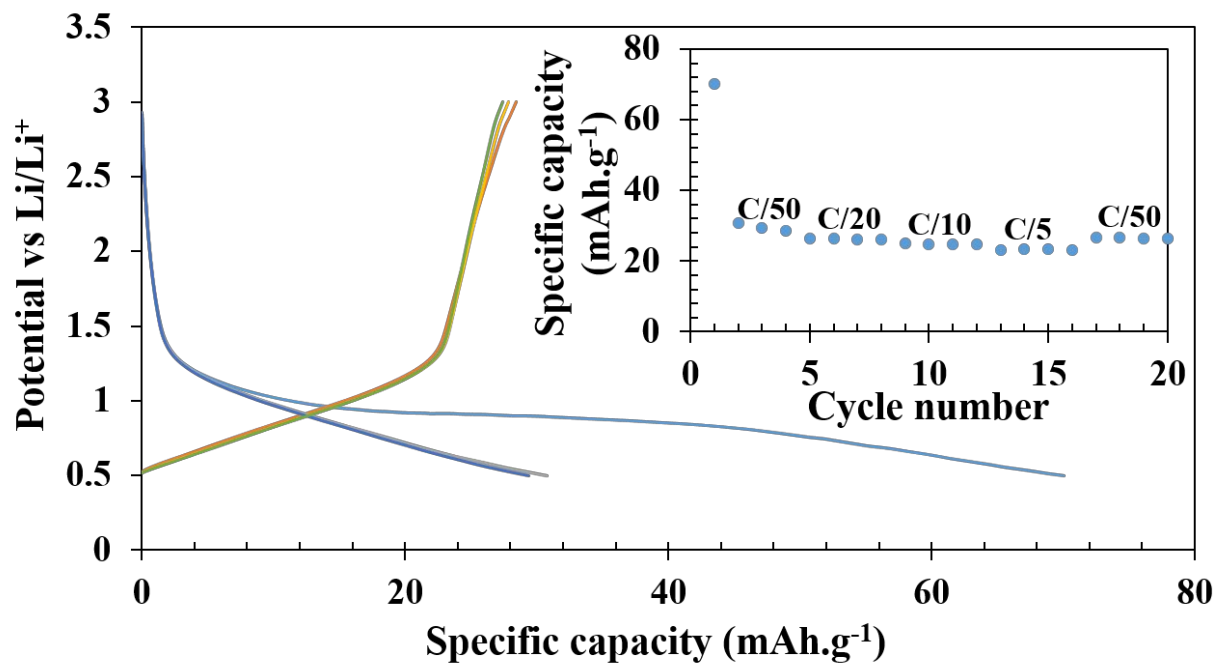

**Figure S9.** Galvanostatic charge-discharge profiles for half cell with lithium anode and super P carbon as cathode at C/50 from 0.5 V to 3.0 V. (Inset shows discharge specific capacity at different C-rates).

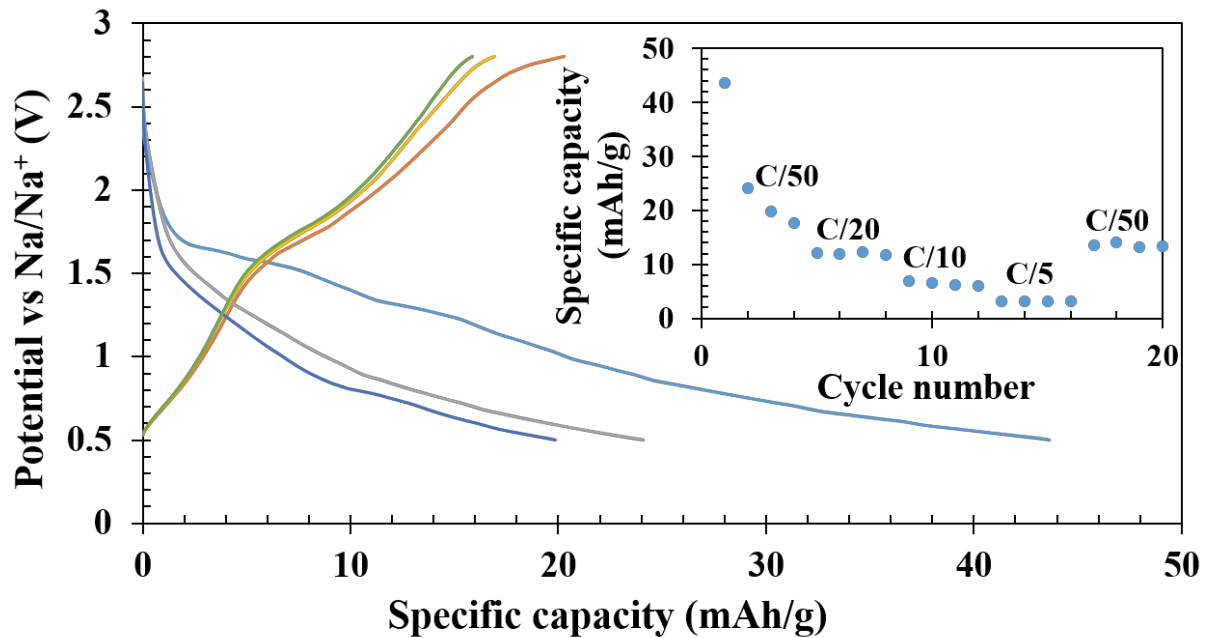

**Figure S10.** Galvanostatic charge-discharge profiles for Na-ion batteries at C/50 from 0.5 V to 2.8 V. (Inset shows discharge specific capacity at different C-rates).

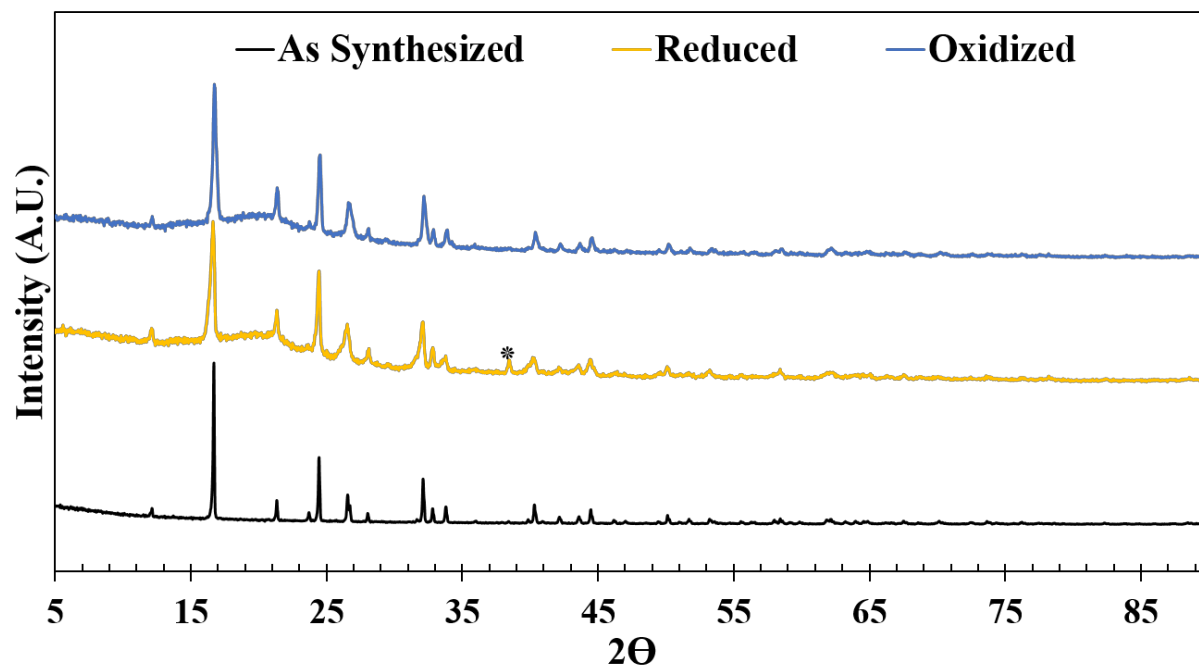

**Figure S11.** Comparison of PXRDs of oxidized and reduced (chemically) samples with as-synthesized pristine,  $\text{LiV}(\text{HPO}_3)_2$ . (\* indicates Al peak)

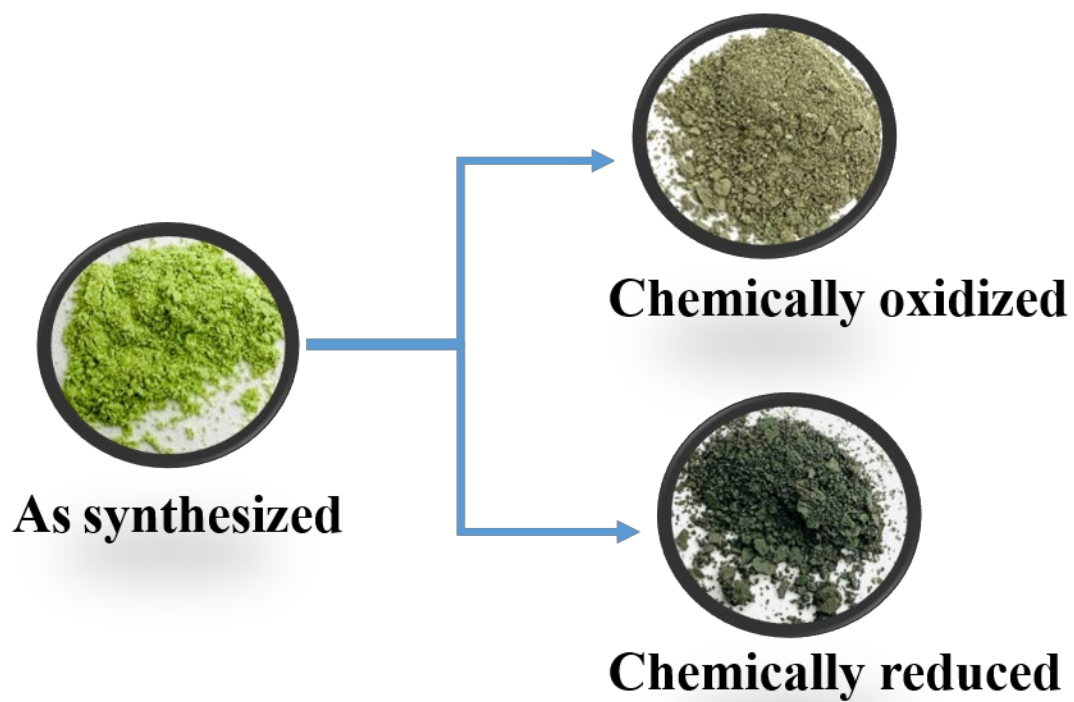

**Figure S12.** A photograph of the as-synthesized, chemically reduced and chemically oxidized  $\text{LiV}(\text{HPO}_3)_2$ .

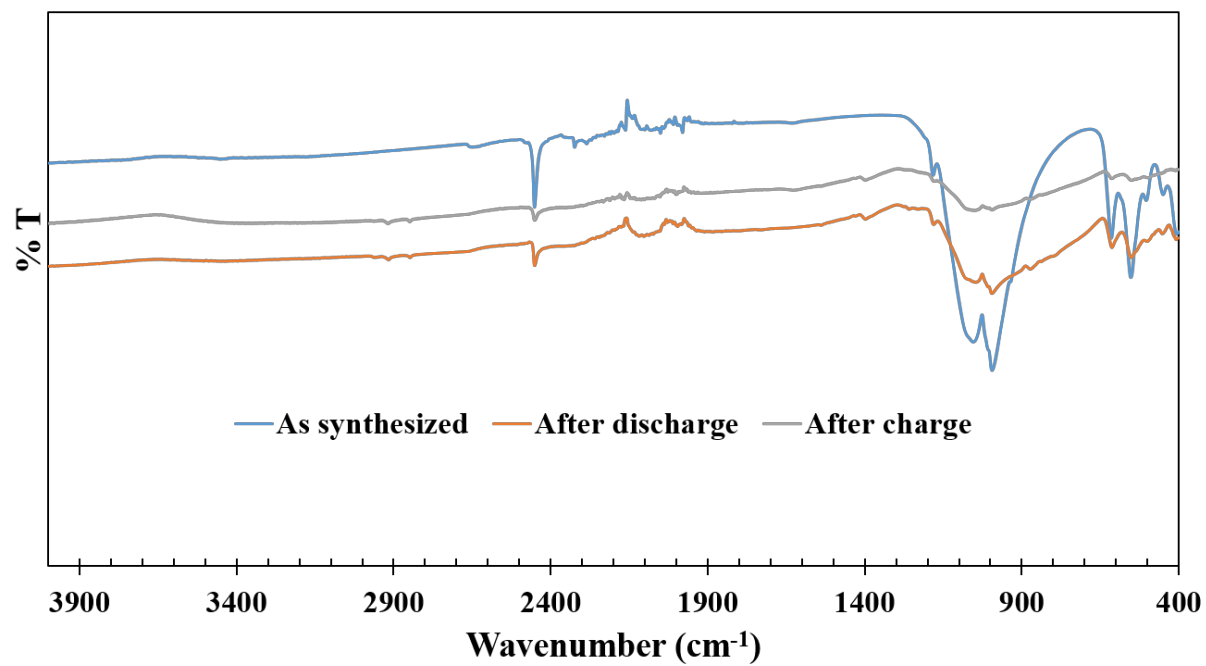

**Figure S13.** FT-IR spectra of cathode materials (after charge & discharge) in comparison with as synthesized sample of  $\text{LiV}(\text{HPO}_3)_2$ .

**Table S1.** Atomic coordinates and equivalent isotropic displacement parameters ( $\text{\AA}^2$ ) of  $\text{LiV}(\text{HPO}_3)_2$ .  $U(\text{eq})$  is defined as one third of the trace of the orthogonalized  $U^{ij}$  tensor.

| Atom  | Wyckoff | x/a       | y/b       | z/c       | U(eq)    |
|-------|---------|-----------|-----------|-----------|----------|
| V(1)  | 8d      | 0.2843(3) | 0.2500(3) | 0.1250(3) | 0.004(1) |
| P(1)  | 16e     | 0.4463(3) | 0.2479(8) | 0.4011(8) | 0.015(1) |
| O(1)  | 16e     | 0.3431(7) | 0.1911(8) | 0.4882(9) | 0.014(1) |
| O(2)  | 16e     | 0.4244(9) | 0.2126(2) | 0.2548(9) | 0.007(1) |
| O(3)  | 16e     | 0.5787(2) | 0.2154(8) | 0.4485(9) | 0.008(1) |
| Li(1) | 8d      | 0.5651(3) | 0.2500(3) | 0.1250(3) | 0.025(1) |
| H(1)  | 16e     | 0.4440(8) | 0.3736(8) | 0.4090(8) | 0.007(1) |

Table S2. Impedance equivalent circuit parameters for freshly fabricated and cycled cells.

|                  |                       |                           |                          | CPE1             |      | CPE2             |      | CPE3             |      |
|------------------|-----------------------|---------------------------|--------------------------|------------------|------|------------------|------|------------------|------|
|                  | $R_s$<br>( $\Omega$ ) | $R_{SEI}$<br>( $\Omega$ ) | $R_{Ct}$<br>( $\Omega$ ) | C<br>( $\mu F$ ) | P    | C<br>( $\mu F$ ) | P    | C<br>( $\mu F$ ) | P    |
| Fresh battery    | 12.56                 |                           | 74.94                    |                  |      | 75.07            | 0.65 | 2246             | 0.91 |
| After 1 cycle    | 12.41                 | 11.41                     | 86.45                    | 217              | 0.91 | 35.93            | 0.63 | 2688             | 0.78 |
| After 5 cycles   | 9.59                  | 65.17                     | 72.98                    | 156              | 0.48 | 52.01            | 0.80 | 2707             | 0.83 |
| After 100 cycles | 11.64                 | 660.6                     | 67.97                    | 51               | 0.67 | 99.19            | 0.31 | 1695             | 0.49 |



**Table S3.** Rietveld refinement values of cathode materials at different states of discharge. 1, 2, 3, 4 and 5 refers to the position in the discharge curve in the Figure 8a where cells were broken.

| Cell                  | 1          | 2          | 3          | 4          | 5          |
|-----------------------|------------|------------|------------|------------|------------|
| parameters            |            |            |            |            |            |
| $a = b$ (Å)           | 10.579(5)  | 10.618(4)  | 10.627(4)  | 10.658(3)  | 10.768(2)  |
| $c$ (Å)               | 9.990(3)   | 10.010(2)  | 10.014(5)  | 10.060(3)  | 10.085(3)  |
| $V$ (Å <sup>3</sup> ) | 1118.18(5) | 1128.76(4) | 1131.08(5) | 1142.84(5) | 1169.39(3) |
| wR                    | 12.45 %    | 10.37 %    | 12.07 %    | 11.07 %    | 12.71 %    |

**Table S4.** Rietveld refinement values of oxidized and reduced (chemically & electrochemically) samples in comparison with as synthesized sample of  $\text{LiV}(\text{HPO}_3)_2$ .

| Cell parameters       | As synthesized | Chemically Oxidized | Chemically Reduced |
|-----------------------|----------------|---------------------|--------------------|
| $a = b$ (Å)           | 10.5987(4)     | 10.589 (3)          | 10.651(2)          |
| $c$ (Å)               | 9.9843(5)      | 9.996 (3)           | 9.979(3)           |
| $V$ (Å <sup>3</sup> ) | 1121.57(4)     | 1120.99(5)          | 1132.23(3)         |
| wR                    | 12.45 %        | 8.78 %              | 11.07 %            |
